# Supplementary material
Source: publisher figshare collection journal article supplement (https://tandf.figshare.com/articles/dataset/_/6741476)
Supplement: Supplementary file 2 [file 1]

**(a)****[FeFe] hydrogenase**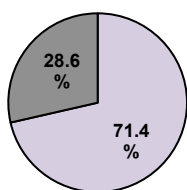**[NiFe] hydrogenase**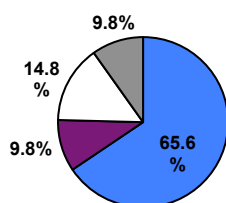**(b)****ACD/ACSS**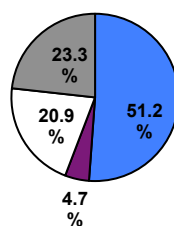**AckA**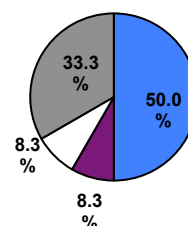

■ *Anaeromyxobacter*   ■ *Geobacter*   ■ *Desulfovibrio*  
□ Other genera   ■ unclassified *Deltaproteobacteria*

**Figure S2.** Taxonomic composition at the genus level of the deltaproteobacterial transcripts relevant to hydrogen generation ([FeFe] hydrogenase, [NiFe] hydrogenase) (a) and acetate generation (ACD/ACSS; acetyl-CoA decarbonylase/synthase, ackA; acetate kinase) (b) in D layer of the W6 period. Data are shown as means of three replicates.
