# Supplementary material
Source: publisher figshare collection journal article supplement (https://tandf.figshare.com/articles/dataset/_/6741476)
Supplement: Supplementary file 3 [file 1]

Table S2. Summary of deep metatranscriptomics of soil samples collected 6 weeks after waterlogging (W6).

| Soil ID | Layer | Replicate | No. of sequences                 |         |                         |            |            |                       |                       |          |             | MG-RAST ID |  |
|---------|-------|-----------|----------------------------------|---------|-------------------------|------------|------------|-----------------------|-----------------------|----------|-------------|------------|--|
|         |       |           | total (length <sup>a</sup> (bp)) | rRNA    | Protein<br>coding genes | <i>pmo</i> | <i>mcr</i> | [FeFe]<br>hydrogenase | [NiFe]<br>hydrogenase | ACD/ACSS | <i>ackA</i> |            |  |
| W6      | S     | 1         | 7,240,814<br>(175±35)            | 258,259 | 41,431                  | 86         | 1          | 0                     | 4                     | 18       | 6           | 4675403.3  |  |
|         |       | 2         | 6,017,177<br>(173±37)            | 262,640 | 38,518                  | 35         | 1          | 1                     | 2                     | 26       | 0           | 4675404.3  |  |
|         |       | 3         | 6,968,767<br>(176±38)            | 286,426 | 43,200                  | 58         | 1          | 0                     | 8                     | 29       | 4           | 4675402.3  |  |
|         | D     | 1         | 5,667,389<br>(182±37)            | 281,362 | 107,208                 | 31         | 28         | 14                    | 61                    | 125      | 36          | 4678309.3  |  |
|         |       | 2         | 5,170,274<br>(186±37)            | 189,023 | 110,956                 | 21         | 79         | 30                    | 44                    | 120      | 30          | 4678318.3  |  |
|         |       | 3         | 6,301,014<br>(187±36)            | 304,122 | 134,976                 | 14         | 276        | 15                    | 49                    | 116      | 43          | 4678319.3  |  |
