# Supplementary material
Source: publisher figshare collection journal article supplement (https://tandf.figshare.com/articles/dataset/_/6741476)
Supplement: Supplementary file 4 [file 1]

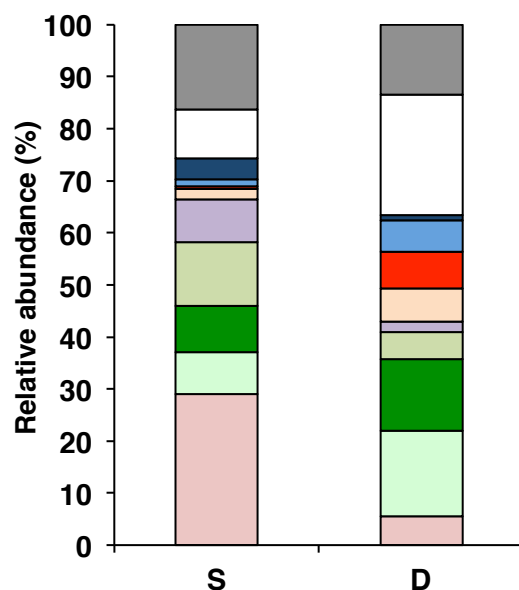

*Methanosarcina*
 *Nitrososphaera*
 *Methanoregula*
 Other genera

*Methanosaeta*
 *Cenarchaeum*
 *Caldisphaera*
 Unclassified Archaea

*Methanocella*
 *Candidatus Nitrosocaldus*
 *Nitrosopumilus*

**Figure S1.** Taxonomic composition at the class level of archaeal rRNA in the W6 period. Soil samples were collected from depths of 0–1 cm (S layer) and 5–7 cm (D layer). Data are shown as means of three replicates.
