# Supplementary material
Source: publisher figshare collection journal article supplement (https://tandf.figshare.com/articles/dataset/_/6741476)
Supplement: Supplementary file 5 [file 1]

Archive with 8 entries (8 files):
- tssp_a_1457409_sm9567.pdf
- tssp_a_1457409_sm9565.pdf
- tssp_a_1457409_sm9564.pdf
- tssp_a_1457409_sm9563.pdf
- tssp_a_1457409_sm9562.pdf
- tssp_a_1457409_sm9561.pdf
- tssp_a_1457409_sm9560.pdf
- tssp_a_1457409_sm9559.pdf
