# Supplementary material
Source: publisher figshare collection journal article supplement (https://tandf.figshare.com/articles/dataset/_/6741476)
Supplement: Supplementary file 5 [file 1 › tssp_a_1457409_sm9561.pdf]

**(a)****[FeFe] hydrogenase**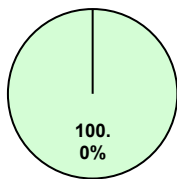**[NiFe] hydrogenase**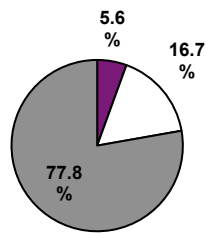**(b)****ACD/ACSS**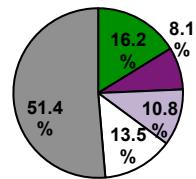**AckA**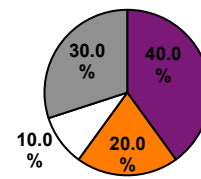

■ *Candidatus Koribacter*
■ *Candidatus Solibacter*
■ *Edaphobacter*
■ *Geothrix*  
■ *Holophaga*
■ Other genera
 ■ unclassified *Acidobacteria*

**Figure S3.** Taxonomic composition at the genus level of the acidobacterial transcripts relevant to hydrogen generation ([FeFe] hydrogenase, [NiFe] hydrogenase) (a) and acetate generation (ACD/ACSS; acetyl-CoA decarbonylase/synthase, ackA; acetate kinase) (b) in D layer of the W6 period. Data are shown as means of three replicates.
