# Supplementary material
Source: publisher figshare collection journal article supplement (https://tandf.figshare.com/articles/dataset/_/6741476)
Supplement: Supplementary file 5 [file 1 › tssp_a_1457409_sm9562.pdf]

**(a)**

[FeFe] hydrogenase

[NiFe] hydrogenase

no  
detection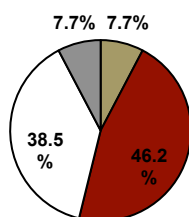**(b)**

ACD/ACSS

AckA

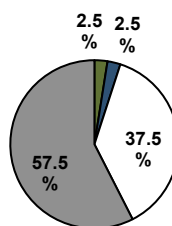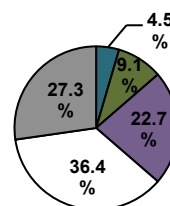*Azoarcus**Sulfuricella**Ramlibacter**Variovorax**Burkholderia**Curvibacter*

Other genera

Unclassified *Betaproteobacteria*

**Figure S4.** Taxonomic composition at the genus level of the betaproteobacterial transcripts relevant to hydrogen generation ([FeFe] hydrogenase, [NiFe] hydrogenase) (a) and acetate generation (ACD/ACSS; acetyl-CoA decarbonylase/synthase, ackA; acetate kinase) (b) in D layer of the W6 period. Data are shown as means of three replicates.
