# Supplementary material
Source: publisher figshare collection journal article supplement (https://tandf.figshare.com/articles/dataset/_/6741476)
Supplement: Supplementary file 5 [file 1 › tssp_a_1457409_sm9564.pdf]

**(a)****[FeFe] hydrogenase****[NiFe] hydrogenase**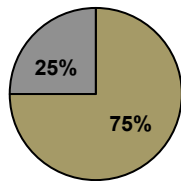**no  
detection** *Thermogutta***(b)****ACD/ACSS****AckA****no  
detection****no  
detection** Unclassified *Planctomycetes*

**Figure S6.** Taxonomic composition at the genus level of the transcripts derived from the phylum Planctomycetes relevant to hydrogen generation ([FeFe] hydrogenase, [NiFe] hydrogenase) and acetate generation (ACD/ACSS; acetyl-CoA decarbonylase/synthase, ackA; acetate kinase) (b) in D layer of the W6 period. Data are shown as means of three replicates.
