# Supplementary material
Source: publisher figshare collection journal article supplement (https://tandf.figshare.com/articles/dataset/_/6741476)
Supplement: Supplementary file 5 [file 1 › tssp_a_1457409_sm9565.pdf]

Table S1. Summary of pilot metatranscriptomics of all soil samples.

| Soil ID | Layer | Replicate | No. of sequences                 |           |          |                      |            |            | MG-RAST ID |           |
|---------|-------|-----------|----------------------------------|-----------|----------|----------------------|------------|------------|------------|-----------|
|         |       |           | total (length <sup>a</sup> (bp)) |           | rRNA     | Protein coding genes | <i>pmo</i> | <i>mcr</i> |            |           |
|         |       |           |                                  |           |          |                      |            |            |            |           |
| W0      | S     | 1         | 1,145,090                        | (165±30)  | 184,089  | 73,381               | 3          | 3          | 4574619.3  |           |
|         |       | 2         | 2,055,449                        | (163±28)  | 358,899  | 114,410              | 9          | 2          | 4574620.3  |           |
|         |       | 3         | 1,986,908                        | (152±30)  | 319,619  | 103,841              | 4          | 8          | 4574621.3  |           |
| W2      |       | 1         | 1,232,072                        | (216±57)  | 238,286  | 96,158               | 14         | 1          | 4572585.3  |           |
|         |       | 2         | 1,937,439                        | (185±54)  | 142,610  | 54,663               | 24         | 1          | 4571599.3  |           |
|         |       | 3         | 688,359                          | (163±30)  | 291,217  | 112,538              | 3          | 1          | 4572782.3  |           |
| W6      |       | 1         | 1,923,602                        | (199±59)  | 275,268  | 102,324              | 5          | 4          | 4572781.3  |           |
|         |       | D         | 2                                | 2,274,209 | (149±31) | 266,772              | 86,520     | 7          | 5          | 4572805.3 |
|         |       |           | 3                                | 811,392   | (157±31) | 122,103              | 47,740     | 2          | 3          | 4572786.3 |
|         | S     |           | 1                                | 1,223,076 | (141±27) | 138,034              | 55,520     | 13         | 0          | 4566479.3 |
|         |       | 2         | 1,181,211                        | (141±26)  | 139,879  | 56,558               | 24         | 0          | 4566762.3  |           |
|         |       | 3         | 428,896                          | (198±39)  | 92,371   | 38,797               | 7          | 1          | 4574613.3  |           |
|         | I     | 1         | 2,468,737                        | (150±31)  | 311,017  | 100,885              | 4          | 51         | 4572787.3  |           |
|         |       | D         | 2                                | 1,742,462 | (145±26) | 243,724              | 77,342     | 6          | 39         | 4567420.3 |
|         |       |           | 3                                | 1,584,681 | (193±37) | 259,385              | 92,373     | 5          | 54         | 4574668.3 |
| S       |       |           | 1                                | 1,677,325 | (227±50) | 306,346              | 114,344    | 1          | 0          | 4573386.3 |
|         |       | 2         | 1,387,337                        | (218±56)  | 247,417  | 95,530               | 6          | 0          | 4573391.3  |           |
|         |       | 3         | 1,344,673                        | (186±39)  | 214,615  | 82,554               | 2          | 0          | 4574614.3  |           |
| CD      |       | 1         | 1,668,613                        | (216±49)  | 244,786  | 94,560               | 6          | 0          | 4573395.3  |           |
|         |       | D         | 2                                | 1,493,309 | (233±50) | 258,504              | 98,083     | 3          | 1          | 4573390.3 |
|         |       |           | 3                                | 813,068   | (189±41) | 131,574              | 55,957     | 7          | 2          | 4574618.3 |
|         | S     |           | 1                                | 146,904   | (224±34) | 31,066               | 18,467     | 1          | 0          | 4582024.3 |
|         |       | 2         | 1,588,017                        | (222±34)  | 124,558  | 98,452               | 5          | 0          | 4582027.3  |           |
|         |       | 3         | 1,829,917                        | (203±38)  | 128,365  | 106,545              | 9          | 1          | 4582030.3  |           |
|         | D     | 1         | 9,578                            | (219±34)  | 3,356    | 1,646                | 0          | 0          | 4582026.3  |           |
|         |       | 2         | 1,270,223                        | (219±35)  | 98,544   | 75,441               | 4          | 3          | 4582029.3  |           |
|         |       | 3         | 413,131                          | (218±34)  | 48,080   | 33,971               | 0          | 1          | 4582049.3  |           |
